22

## 23 **Summary**

24 Since the outbreak of the SARS-CoV-2 pandemic, there have been intense structural studies  
25 on purified recombinant viral components and inactivated viruses. However, investigation of  
26 the SARS-CoV-2 infection in the native cellular context is scarce, and there is a lack of  
27 comprehensive knowledge on SARS-CoV-2 replicative cycle. Understanding the genome  
28 replication, assembly and egress of SARS-CoV-2, a multistage process that involves different  
29 cellular compartments and the activity of many viral and cellular proteins, is critically  
30 important as it bears the means of medical intervention to stop infection. Here, we  
31 investigated SARS-CoV-2 replication in Vero cells under the near-native frozen-hydrated  
32 condition using a unique correlative multi-modal, multi-scale cryo-imaging approach  
33 combining soft X-ray cryo-tomography and serial cryoFIB/SEM volume imaging of the  
34 entire SARS-CoV-2 infected cell with cryo-electron tomography (cryoET) of cellular  
35 lamellae and cell periphery, as well as structure determination of viral components by  
36 subtomogram averaging. Our results reveal at the whole cell level profound cytopathic effects  
37 of SARS-CoV-2 infection, exemplified by a large amount of heterogeneous vesicles in the  
38 cytoplasm for RNA synthesis and virus assembly, formation of membrane tunnels through  
39 which viruses exit, and drastic cytoplasm invasion into nucleus. Furthermore, cryoET of cell  
40 lamellae reveals how viral RNAs are transported from double-membrane vesicles where they  
41 are synthesized to viral assembly sites; how viral spikes and RNPs assist in virus assembly  
42 and budding; and how fully assembled virus particles exit the cell, thus establishing a model of  
43 SARS-CoV-2 genome replication, virus assembly and egress pathways.

44

45 **Keywords:** SARS-CoV-2; COVID-19; cryoEM; cryoET; subtomogram averaging;

46 cryoFIB/SEM; soft X-ray cryo-tomography; virus assembly; viral egress, spike

47

48

## 49 **Introduction**

50 Since December 2019, the world has been in the middle of what has been dubbed the  
51 “greatest pandemic of the century”. The etiological agent was named Severe Acute  
52 Respiratory Syndrome Coronavirus 2 (SARS-CoV-2) and the disease caused by it  
53 Coronavirus Disease 2019 (COVID-19). Coronaviruses are small enveloped viruses with  
54 positive non-segmented RNA genome. Among RNA viruses, Coronaviruses bear one of the  
55 largest genomes and its replication in the cell is complex involving frameshift slipping and  
56 replicase jumps with abundant RNA duplexes being generated. Coronaviruses, like most  
57 RNA viruses, induce the development of a range of membrane compartments that seclude  
58 and protect the viral components contributing to increased replication efficiency and innate  
59 immune recognition escape (de Wilde et al., 2013; Ertel et al., 2017; Paul et al., 2013; Snijder  
60 et al., 2020; Wolff et al., 2020b; Zhou et al., 2017).

61

62 All Coronavirus structural proteins arise from the translation of positive subgenomic RNA,  
63 which in turn are generated by replicase jumps when the negative strand copy of the viral  
64 genome is replicated. The S protein makes the viral spike, responsible for cellular attachment,  
65 entry, and fusion. It adopts two main conformations: prefusion, composed of trimers of S1  
66 and S2, and postfusion, a non-active conformation composed solely of S2 (Cai et al., 2020;  
67 Fan et al., 2020; Hoffmann et al., 2020; Lan et al., 2020; Shang et al., 2020; Walls et al.,  
68 2020; Wang et al., 2020; Yan et al., 2020). The N protein is responsible for encapsidating and  
69 protecting the genomic viral RNA, forming ribonucleoprotein (RNP) complexes that reside in  
70 the internal space of the viral particle. The E protein is the smallest of the structural proteins  
71 and is thought to act as an ion channel (Surya et al., 2018). The M protein is the most

72 abundant protein in SARS-CoV-2 and is a transmembrane protein that lines the internal  
73 surface of the virus lipid membrane (Neuman et al., 2011).

74

75 The coronavirus cycle starts with S interaction with ACE2 in the host cell surface (Hoffmann  
76 et al., 2020; Lan et al., 2020; Shang et al., 2020; Song et al., 2018; Wang et al., 2020; Yan et  
77 al., 2020). This interaction can either be followed by S2' cleavage at the cell surface by  
78 TMPRSS2, or trigger the endocytosis of the viral particle, when TMPRSS2 is not present  
79 (Hoffmann et al., 2020). Upon a second still not completely characterized trigger, which may  
80 be the S2' site cleavage (by TMPRSS2 or endosomal proteases) and/or endosomal  
81 acidification, the spike changes conformation and inserts its fusogenic peptide into the host  
82 membrane to fuse it with the viral envelope, after which the spike finally adopts the  
83 postfusion conformation (Belouzard et al., 2009; Cai et al., 2020; Fan et al., 2020; Simmons  
84 et al., 2004). The viral contents are then released into the cytoplasm, and the precursor  
85 polyproteins Pp1a and Pp1ab are synthesized. Non-structural proteins 3, 4 and 6, which are  
86 part of Pp1a/Pp1ab, induce the formation of secluded, often interconnected, membranous  
87 compartments known as DMVs (Double Membrane Vesicles) (Doyle et al., 2018;  
88 Hagemeijer et al., 2014; Oudshoorn et al., 2017). The DMVs compartmentalize the  
89 Replication Transcription Complexes (RTCs) and are the sole compartments where viral  
90 genome replication takes place (Snijder et al., 2020), both for the synthesis of the negative  
91 strand viral RNA and for the synthesis of the positive strand subgenomic mRNAs and viral  
92 genome RNA copies. Initially, it was thought that these compartments were sealed and had  
93 no connection to the cytoplasm, raising the mystery of how the mRNAs could reach the  
94 cytoplasm to be translated by the cellular ribosomes. Recently, however, a molecular pore  
95 has been described in MHV and SARS-CoV-2 that can serve as export portal for the mRNA  
96 and positive strand viral genome copies (Wolff et al., 2020a). The assembly of the viral

97 particle is thought to take place at modified cellular membranes derived from the ER, Golgi  
98 and ERGIC (endoplasmic-reticulum-Golgi intermediate compartment), and viral release  
99 through exocytosis, based on studies of other coronaviruses (Goldsmith et al., 2004; Knoops  
100 et al., 2008; Ogando et al., 2020; Stertz et al., 2007). Although, there have been intense  
101 structural studies on recombinant viral components and purified inactivated viruses  
102 (Hoffmann et al., 2020; Ke et al., 2020; Lan et al., 2020; Shang et al., 2020; Song et al., 2018;  
103 Turoňová et al., 2020; Wang et al., 2020; Yan et al., 2020; Yao et al., 2020), investigation of  
104 the SARS-CoV-2 replication process in the native cellular context is scarce, and viral  
105 assembly and egress are still not well understood at the molecular level.

106

107 In this study we investigated SARS-CoV-2 replication in Vero cells under near-native  
108 conditions exploiting a unique correlative multi-modal multi-scale cryo-imaging approach by  
109 combining soft X-ray cryo-tomography and serial cryoFIB/SEM volume imaging of the  
110 entire SARS-CoV-2 infected cell with cryo-electron tomography (cryoET) of cell lamellae  
111 and cell periphery, as well as structure determination of viral components through  
112 subtomogram averaging. This approach empowers a holistic view of SARS-CoV-2 infection,  
113 from the whole cell to individual molecules, revealing novel pathways of SARS-CoV-2  
114 assembly and egress and cytopathic effects of SARS-CoV-2 infection.

115

## 116 **Results**

117

### 118 **SARS-CoV-2 replication induces profound cytopathic effects in host cells**

119 To image and investigate SARS-CoV-2 replication in near-native cell context, we infected  
120 Vero cells grown on indexed EM grids with SARS-CoV-2 at 0, 0.1 and 0.5 multiplicity of  
121 infection (MOI). At 24 hours post infection (hpi), the cells were fixed with 4%

122 paraformaldehyde and plunge frozen in liquid ethane. As illustrated in the workflow (Figure  
123 S1), cryoEM grids containing SARS-CoV-2 infected cells were first screened in a Titan  
124 Krios to identify each individual infected cell (39.2 % for MOI of 0.1 and 45.4% for MOI  
125 0.5) where cryoET tilt series were collected at the cell periphery. The grids were then  
126 transferred to a FIB/SEM dualbeam instrument and the same infected cells were subjected to  
127 either serial cryoFIB/SEM volume imaging (Zhu et al., 2021) or cryoFIB milling of cellular  
128 lamellae where additional cryoET tilt series were collected (Sutton et al., 2020).

129 Alternatively, we imaged infected cells on cryoEM grids by soft X-ray cryo-tomography  
130 (Harkiolaki et al., 2018; Kounatidis et al., 2020). It's worth mentioning that serial  
131 cryoFIB/SEM volume imaging is emerging as a new cryo-volume imaging technique for the  
132 study of large volumes of near-native, fully hydrated frozen cells and tissues at voxel sizes of  
133 10 nm and below, adding to the capability of soft X-ray cryo-tomography. These imaging  
134 modalities provide structural information at different length scales and are highly  
135 complementary. Such a unique approach enabled the comprehensive investigation of the  
136 SARS-CoV-2 replication and cytopathology effects in a multi-modal, multi-scale and  
137 correlative manner.

138

139 Compared to uninfected cells (Figure S2, Movie 1), serial cryoFIB/SEM images of SARS-  
140 CoV-2 infected cells display an extensive array of cytopathological alterations throughout the  
141 entire cell, as illustrated in Figure 1 and Movies 2-5. At the cell surface, there were many  
142 virus-containing membrane tunnels extending deep into the cell (Figure 1A, "T", Movie 2),  
143 in addition to electron lucent membrane vesicles (Figure 1A, "V"). Virus particles were also  
144 found within intracellular vesicles not connected to cell membrane (Figure 1A, red arrow).

145 Deep into the cell, much of the cytoplasm is occupied with abundant membrane  
146 compartments of different morphologies, including numerous vesicles ("V") (Movie 4), the

147 complex membrane compartment (pink arrow), the endoplasmic reticulum (ER) and the  
148 nucleus (“Nuc”) (Figure 1B, Movie 2 and 3). Most of these vesicles are the so-called “double  
149 membrane vesicles” (DMVs) where viral genome replication takes place (Snijder et al.,  
150 2020). Interestingly, we observed a different type of electron lucent vesicles which appears  
151 lined up with a string of very small vesicles (Figure 1B, “V\*”), the function of which is  
152 revealed by cryoET of cell lamella discussed in sections below. At the mid-cell where the  
153 nucleus is present, cryoFIB/SEM images clearly display nuclear pores in frozen-hydrated  
154 cells (Figure 1C, Figure S2A&C, blue arrows). Mitochondria are frequently disrupted in the  
155 infected cells (Figure 1C, yellow arrow, Movie 2) compared to the uninfected cells (Figure  
156 S2, Movie 1). In addition, cryoFIB/SEM reveals electron-dense complex membrane  
157 compartments often seen in infected cells (Figure 1B, pink arrows). The more striking  
158 feature, observed in 2 of 3 infected cells imaged, is the cytopathic damage to the nucleus  
159 compared to the control cells, where nearly a half of the nucleus has been taken up by the  
160 invaginated cytoplasm (Figure 1D, Movie 5). We noticed that in a recent study, such  
161 cytoplasm invagination was also seen in one of the conventional EM images of stained  
162 plastic sections of SARS-CoV-2 infected cells, although no description was given (Lamers et  
163 al., 2020).

164

165 Independently, we investigated cytopathic effect of SARS-CoV-2 infection using soft X-ray  
166 cryo-tomography. Consistent with the cryoFIB/SEM volume imaging results, the overview  
167 images of soft X-ray display profound changes in mitochondria morphology, as they appear  
168 fragmented in the SARS-CoV-2 infected cell (Figure S3B&D, F), also shown in cryoET  
169 (Figure S4), compared to the extended and networked mitochondria in the uninfected cell  
170 (Figure S3A&C). Consistent with this, SARS-CoV-2 infection leads to profound  
171 downregulation of transcriptional pathways related to mitochondrial function in human

172 induced pluripotent stem-cell derived cardiomyocytes (Sharma et al., 2020), and cardiac  
173 complications are more common in COVID-19 patients (Fried et al., 2020). Virus particles  
174 on the cell surface are clearly distinguishable in soft X-ray cryo-tomogram (Figure S3E,  
175 black arrow). Also clearly observed are extensive vesiculation (Figure S3F) and a partial  
176 nucleus invagination in the infected cell (Figure 3G).

177

178 Altogether, soft X-ray cryo-tomography and serial cryoFIB/SEM volume imaging provide a  
179 comprehensive overview of cytopathic effects of SARS-CoV-2 infection in native cells,  
180 including membrane tunnels at the cell surface, virus-containing vesicles, intracellular  
181 complex membrane compartments, and numerous heterogeneous vesicles, invagination of  
182 nuclear membrane and damaged mitochondria, all of which can be correlated with in-depth *in*  
183 *cellulo* cryoET analysis (sections below).

184

### 185 **SARS-CoV-2 RNA synthesis and transport**

186 The first step in SARS-CoV-2 production is viral genome replication. Coronaviruses have  
187 evolved a sophisticated RNA replication strategy for the generation of the subgenomic  
188 RNAs, which relies heavily on double stranded RNA intermediaries, a potent activator of  
189 RIG-I and MDA-5 (Andrejeva et al., 2004; Hornung et al., 2006; Neufeldt et al., 2016). Thus,  
190 cellular compartmentalization of RNA transcripts serves as an innate immune evasion  
191 strategy. DMVs are induced during the replication of a variety of RNA viruses (de Wilde et  
192 al., 2013; Ertel et al., 2017; Paul et al., 2013; Wolff et al., 2020b; Zhou et al., 2017), and were  
193 identified as the sole compartment where viral RNA transcription occurs for coronaviruses  
194 (Snijder et al., 2020). Indeed, cryoET of cell lamella revealed that abundant intracellular  
195 vesicles observed in the 3D volume of infected cell (Figure 1D, Movie 3 and 4) are clearly  
196 DMVs containing filamentous structures that likely correspond to viral RNA transcripts as



197 previously suggested (Reggiori et al., 2010; Snijder et al., 2020) (Figure 2A-C, Movie 6).  
198 There are also a substantial amount of so-called vesicle packets (VPs) (Figure 2B) (Ogando  
199 et al., 2020), apparently resulting from the fusion of the outer membranes of DMVs. Since  
200 the sample is 24 hours post infection, this is consistent with a previous observation that the  
201 number of VPs increases with the time of infection (Snijder et al., 2020). Until very recently,  
202 DMVs were thought to be completely enclosed, which raised the question of how the viral  
203 mRNAs could gain access to the cytoplasm to be translated. We observed several double-  
204 membrane-spanning pore complexes in DMVs (Figure 2C-F, yellow arrow), resembling the  
205 RNA transport portal seen in DMVs of murine hepatitis coronavirus (MHV) infected cells in  
206 a recent study (Wolff et al., 2020a). However, the portal appears rare in DMVs of SARS-  
207 CoV-2 (total 9 portals from 24 DMVs) compared to those of MHV (8 portals per DMV),  
208 signifying the difference between coronaviruses. We also observed vaultosomes near the  
209 DMV outer membranes (Figure 2F, black arrow). It is still unclear what is the physiological  
210 role of vaults is, but they have been associated with RNA nucleocytoplasmic transport, innate  
211 immunity, and cellular stress response (Berger et al., 2009; Woodward et al., 2015), which  
212 are likely to be activated by infection.

213

#### 214 **SARS-CoV-2 assembly and budding**

215 The translation of the subgenomic vRNAs gives rise, amongst others, to the structural  
216 proteins N, M, E and S, which are required for assembly. M, E and S are membrane-  
217 associated proteins and are localized to the ER, Golgi and the ERGIC (Reggiori et al., 2010;  
218 Stertz et al., 2007). The N protein associates with the genomic vRNA and M protein, which  
219 presumably drives vRNA packaging and genome encapsidation (Lu et al., 2020; Vennema et  
220 al., 1996). The main assembly and budding site of other coronaviruses has been previously  
221 described at the ERGIC by conventional EM of stained, plastic embedded, and sectioned

222 samples (de Wilde et al., 2013; Knoops et al., 2008; Reggiori et al., 2010; Stertz et al., 2007).  
223 In serial cryoFIB/SEM images of SARS-CoV-2 infected cells, we clearly observed vesicles  
224 containing virus particles (Figure 3A, black arrows), along with a string of small dense  
225 vesicles lining along the vesicle membrane in the close proximity to the DMVs (Figure 3B,  
226 pink arrow). High-resolution cryoET of cell lamella from a similar cellular region allowed us  
227 to unambiguously identify that these are in fact SARS-CoV-2 assembly and budding sites  
228 (Figure 3C-E). CryoET further revealed that the string of small dense vesicles are SARS-  
229 CoV-2 spike containing trans-Golgi transport vesicles, supplying newly synthesized spikes to  
230 the assembly sites via fusion with the SMVs (Figure 3C-E pink arrows, Movie 7). Indeed,  
231 spikes are observed on SMV membranes clustered at the assembly sites, in addition to being  
232 sparsely distributed (Figure 2D, Figure 3C-E, red arrows, Movie 7). Interestingly, several  
233 SARS-CoV-2 assembly intermediates were observed within a single tomogram from a cell  
234 lamella (Figure 3C-E, blue arrows, Movie 7), along with fully assembled virus particles  
235 released into SMVs (Figure 3C-E, black arrows, Movie 7), thus allows capturing the active  
236 assembly and budding process of SARS-CoV-2. It is conceivable that upon fusion of  
237 transport vesicles with the SMV, spikes are readily diffused onto the SMV membrane, then  
238 clustering when interacting with N-associated vRNA, possibly via M protein (Lu et al., 2020;  
239 Neuman et al., 2011), which initiates the budding process that finally releases the viral  
240 particle into the SMV. Consistent with this, spike clusters are observed exclusively associated  
241 with the agglutination/gathering of electron dense material, which presumably represents  
242 viral genome. Noticeably, the virus assembly site is frequently present in the vicinity of RNA  
243 portals in DMVs (Figure 2C-E, yellow arrows), potentially facilitating the assembly process.  
244 The N-associated vRNA further matures as distinct RNPs recognizable in the fully assembled  
245 virus particles (Movie 7).

246

247 Most virus particles are found in ERGIC SMVs, some contain a single virion, while others  
248 encompass multiple virions (Figure 3E-F). CryoET and subtomogram averaging of 450  
249 spikes from these particles yielded a density map at 11 Å resolution (at 0.143 FSC cut-off) by  
250 emClarity (Himes and Zhang, 2018) (Figure 3F-G, Figure S5). The averaged density map  
251 resolves the overall spike structure, which overlaps very well with prefusion spike atomic  
252 models (Hoffmann et al., 2020; Lan et al., 2020; Shang et al., 2020; Walls et al., 2020; Wang  
253 et al., 2020; Yan et al., 2020) . Virus particles were also observed in electron-dense complex  
254 autophagolysosome-like compartments (ALC) (Figure 4), which likely correspond to the  
255 complex membrane compartments seen in cryoFIB/SEM (Figure 1B, pink arrows). These  
256 virus particles, however, have either no spikes (Figure 4B) or a few postfusion spikes on their  
257 surfaces (Figure 4E-F). Viruses protected by single membrane vesicles (SMV) in ALC show  
258 prefusion spikes (Figure 4G-H). These could be off-pathway sites of viral assembly (in the  
259 case of SMV-protected viruses displaying prefusion spikes), remnants of late endosomes  
260 from viral entry or lysosomes for viral degradation (in the case of viruses displaying  
261 postfusion spikes or no spike). The fact that the spike proteins are in the postfusion state  
262 suggests that proteolytic processing has taken place in these compartments resulting in S1  
263 shedding. Therefore, we suggest that assembly at the ERGIC SMVs is the only pathway  
264 which will lead to infectious viral progeny.

265

### 266 **SARS-CoV-2 egress with two distinct pathways**

267 There has not been much detailed studies on how SARS-CoV-2 viruses are released from  
268 cell. We investigated SARS-CoV-2 egress using both serial cryoFIB/SEM volume imaging  
269 and cryoET. CryoFIB/SEM images clearly reveal virus exiting tunnels in 3D at the cell  
270 periphery connecting to cell membrane (Figure 5A-B, Movie 2). This likely resulted from the  
271 fusion of very large multi-virus containing vesicles with cell membrane, i.e. egress through

272 exocytosis. Consistent with cryoFIB/SEM analysis, we also observed virus exiting tunnels in  
273 cryo-tomograms (Figure 5C). The fact that these compartments often contained many viral  
274 particles suggests that this is a snapshot of viral exit, rather than cellular entry.

275

276 However, in addition to exocytosis, we also frequently found plasma membrane  
277 discontinuities next to viral particles outside the cell (Figure 5E). There are 116 membrane  
278 lesion sites next to virus particles in 74 tomograms, and 44.6% of tomograms show cell  
279 membrane lesions in infected cells (Figure 5D-E, Movie 8-9), whereas 18.7 % tomograms  
280 from uninfected cells display similar membrane lesions (10 membrane lesion sites from 16  
281 tomograms). Close inspection of individual membrane lesions indicates that the underlying  
282 cytoskeleton, such as actin filaments, is largely intact, and only the plasma membrane was  
283 compromised (Figure 5E inset). The fact that we observed the same membrane lesion, but to  
284 a lesser extent in control cells, suggests that SARS-CoV-2 exploits the host cell machinery  
285 for its egress. Cellular exit through plasma membrane rupture may be an alternative viral  
286 egress pathway of SARS-CoV-2, as this is observed frequently in our data. It is unclear  
287 whether the cell can recover from such membrane wounds, or if exit through membrane  
288 rupture is a sign of late infection and will eventually lead to cell lysis and death. Severe cases  
289 of COVID-19 are characterized by high levels of inflammation markers (Lucas et al., 2020),  
290 and viral lysis may be one of the mechanisms triggering this response.

291

292 CryoET subtomogram averaging of 7090 spikes from extracellular virus particles yielded a  
293 density map at 8.7 Å resolution (at 0.143 FSC cut-off), which represents the prefusion state  
294 (Figure 4F, Figure S5). Spike structures from intracellular and extracellular viruses agree  
295 with each other very well (Figure 4G), suggesting that no further structure rearrangement  
296 takes place for viral spikes from assembly to egress. While all previous spike structures are

297 either from recombinant proteins or from purified inactivated virus particles (Cai et al., 2020;  
298 Fan et al., 2020; Hoffmann et al., 2020; Ke et al., 2020; Lan et al., 2020; Shang et al., 2020;  
299 Turoňová et al., 2020; Walls et al., 2020; Wang et al., 2020; Yan et al., 2020; Yao et al.,  
300 2020), the two spike structures presented here are derived directly from infected cells in the  
301 cellular context, and thus represent the closest to native condition, providing a strong  
302 validation for these *in vitro* structures.

303

## 304 **Discussion**

305 We used a multi-modal, multi-scale and correlative approach to investigate SARS-CoV-2  
306 infection process in native cells, from the whole cell to subcellular and to the molecular level.  
307 The integration of multi-scale imaging data, achieved through this advanced workflow  
308 (Figure S1), has led us to propose a pathway for SARS-CoV-2 replication, in particular virus  
309 genome replication, assembly and egress. The replication of SARS-CoV-2 appears spatially  
310 well-organized and highly efficient. From genome replication, to protein synthesis and  
311 transport, to virus assembly and budding, these processes take place in close-knit cytoplasmic  
312 compartments. As illustrated in Figure 6, RNA replication, including vRNA and mRNA,  
313 occurs in DMVs, secluding them from innate immune response (step 1). The newly  
314 synthesized vRNAs are then transported out of DMVs through the transmembrane portals to  
315 ERGIC virus assembly sites proximal to DMVs and portals (step 2a), whereas mRNAs exit  
316 through the same portal to cytoplasm and ER/Golgi for protein production (step 2b). The  
317 viral spikes, in a trimeric prefusion form produced and matured in ER/Golgi network, are  
318 transported to the ERGIC assembly sites via small transport vesicles (step 3). Upon fusion of  
319 transport vesicles with ERGIC membranes (or SMVs), viral spikes cluster at the assembly  
320 site where vRNA and N protein are present, resulting in a positive membrane curvature and  
321 finally bud into the SMV (step 4). Depending on the number of virus particles within SMVs,

322 there might be two distinct egress pathways: the large virus-containing vesicle (LVCV)  
323 through tunnels via exocytosis (step 5a), and the single virus-containing vesicle (SVCV)  
324 breaking out through cell membrane rupture (step 5b), although it is still unclear what is the  
325 mechanism of membrane rupture exploited by the virus.

326

327 The genome replication, assembly and egress of the virus is a multistage process that is  
328 critically important as it bears the means of medical intervention to stop infection. There are  
329 many aspects of this process await further investigation to dissect the mechanism of SARS-  
330 CoV-2 replication, including the roles of other viral proteins, such as M and E, as well as host  
331 proteins and machines. Nevertheless, this study provides a first glimpse of the SARS-CoV-2  
332 replication cycle under near-native conditions. The methodologies and workflow developed  
333 through this study can be broadly applied to studies of infection processes of many other  
334 viruses or bacteria, beyond SARS-CoV-2.

335

### 336 **Acknowledgments**

337 We thank Ervin Fodor for helpful discussions, critical reading of manuscript, and facilitating  
338 the access to Containment Level 3 lab. We thank Yanan Zhu for help with segmentation and  
339 eBIC staff for technical support. We acknowledge Diamond Light Source for access and  
340 support of the CryoEM facilities at the UK national electron bio-imaging centre (eBIC,  
341 proposals BI26987 and NT21004), funded by the Wellcome Trust, MRC and BBSRC. This  
342 research was supported by the National Institutes of Health grant P50AI150481, the UK  
343 Wellcome Trust Investigator Award 206422/Z/17/Z, the UK Biotechnology and Biological  
344 Sciences Research Council grant BB/S003339/1, and the grant from the Chinese Academy of  
345 Medical Sciences Oxford Institute. Containment level 3 experiments were funded through the  
346 generous support of philanthropic donors to the University of Oxford's COVID-19 Research

347 Response Fund. M.L.K. is supported by the Biotechnology and Biological Sciences Research  
348 Council (BBSRC) (grant number BB/M011224/1).

349

### 350 **Author contributions**

351 P.Z. conceived the research and with M.H., M.L.M-F., W.J. designed the study. A.H.  
352 collected cryoET data. J.B.G. did targeted cryoFIB milling of lamellas. L.C.Z-D., B.B.  
353 collected serial cryoFIB/SEM volume imaging data. A.H., L.M., A-S.K., J.R., Y.S., V.D.L.  
354 and D.S. performed cryoET 3D reconstructions and analyses. D.S. performed subtomogram  
355 averaging. M.L.K. and L.M did viral infections and sample preparation. L.C., L.C.Z-D., D.S.  
356 and M.S. did 3D segmentation. I.K., M.A.K., L.M. and M.H. acquired and processed soft X-  
357 ray cryo-tomography data. L.M. and P.Z. wrote the manuscript with support from all co-  
358 authors.

359

### 360 **Declaration of Interests**

361 The authors declare no competing interests.

362

### 363 **Main Figures Title and Legends**

364 **Figure 1 | Serial cryoFIB/SEM volume imaging of entire SARS-CoV-2 infected cell.** (A-  
365 D) Representative cryoFIB/SEM slices of a SARS-CoV-2 infected cell at the cell periphery  
366 (A), cytoplasm (B), cell nucleus (C), and invagination of cytoplasm into the nuclear space  
367 (note, from a different cell) (D). Scale bars, 500 nm in A-C, 1  $\mu$ m in D. Black and red arrows,  
368 extracellular and intracellular virus particles; blue arrows, nuclear pores; yellow arrow, a  
369 damaged mitochondria; pink arrows, complex membrane compartment; dashed purple arrow,  
370 invagination path; V and V\*, vesicles; T, tunnels; Nuc, nucleus; Cyto, cytoplasm; ER,  
371 Endoplasmic reticulum. (E) Surface rendering of the segmented volume of SARS-CoV-2

372 infected cell shown in A-C. Segmented organelles and virus particles are labeled with colors  
373 indicated. The dashed lines (E, top left panel) indicate the positions of slices shown in A-C,  
374 respectively.

375

376 **Figure 2 | SARS-CoV-2 genome replication and RNA synthesis.** (A-B) Overview of a  
377 SARS-CoV-2 infected cell in cryoFIB/SEM slice (A) and cryo-lamella tomogram slice (B)  
378 depicting double membrane vesicles (DMV) and vesicle packets (VP). (C) Cryo-tomogram  
379 slice of DMV at high magnification. Inset depicts detail of a DMV pore next to a viral  
380 assembly site. (D-E) Pores on DMVs next to assembly sites. (F) Vaultosome in close  
381 proximity to a DMV outer membrane. DMV – Double membrane vesicle. VP – Vesicle  
382 packet. Yellow arrows – DMV portals. Blue arrows – Viral assembly sites. Red arrows –  
383 Viral spikes. Black arrow – Vaultosome. Scale bars are 300 nm in A, 500 nm in B, 100 nm in  
384 C, 50 nm in C inset, 100 nm in D and E, 50 nm in F.

385

386 **Figure 3 | SARS-CoV-2 cytoplasmic viral assembly.** (A-B) CryoFIB/SEM images of two  
387 sequential slices separated by 80 nm. Black arrows point to virus particles in single  
388 membrane vesicle (SMV). Pink arrow points to small dense vesicles lining the outside of  
389 virus-containing SMV. (C) Tomographic slice of cryoFIB lamella depicting SARS-CoV-2  
390 assembly, with DMV portals (yellow arrow), assembling viruses (blue arrow), assembled  
391 virus (black arrow), viral spikes on SMV membranes (red arrows), dense vesicles around the  
392 assembly site (pink arrow, as in B) and a nucleopore (black arrowhead). (D) Density  
393 segmentation of C, displaying three virus particles (black arrows) and two assembly sites  
394 (blue arrows). (E) An enlarged view (at a different angle) of boxed area in C, showing  
395 assembled virus (black arrow), assembling viruses (blue arrows), spikes (red arrows) and  
396 spike-containing vesicles (pink arrows). (F) Large intracellular virus-containing vesicle



397 (LVCV) full of readily assembled viruses. (G) Subtomogram average of viral spikes of  
398 intracellular viruses from cell lamellae at 11 Å resolution, fitted with an atomic model of  
399 spike trimer (PDB 6ZB5) (Toelzer et al., 2020). Scale bar is 300 nm in A and B; and 100 nm  
400 in C, E and F.

401

402 **Figure 4 | Non-productive autophagolysosome-like compartments (ALC). (A)**

403 Tomographic slice of an ALC in cell lamella depicting convoluted membranes containing  
404 virus particles (boxed area). (B) Detailed view of spikeless viruses from the boxed area in A.  
405 (C-D) Consecutive tomographic slices of the same ALC separated by 140 nm, containing  
406 viruses (black and blue boxed areas). (E-F) Detailed view of viruses with a few postfusion  
407 spikes (yellow arrows) from boxed areas in C and D. (G-H) Detailed view of viruses  
408 protected by single membrane vesicles (SMV) harboring prefusion spikes (red arrows) from  
409 blue boxed areas in D. Scale bars are 500 nm in A; 100 nm in B, C; 50 nm in C, D, E, F, G,  
410 H.

411

412 **Figure 5 | SARS-CoV-2 viral egress pathways. (A-B) CryoFIB/SEM images of cell**

413 periphery, depicting virus particles exiting through extended tunnels connected to external of  
414 the cell. (C) CryoET of the SARS-CoV-2 exiting tunnel. (D) Viruses outside of the cell. (E)  
415 Membrane-rupture viral egress. Inset, close-up views of membrane rupture sites. (F)  
416 Subtomogram average of spikes on released viruses at 9 Å resolution fitted with an atomic  
417 model of spike trimer (PDB 6ZB5) (Toelzer et al., 2020), viewed from side and top. (G)  
418 Comparison of spike structures from intracellular assembled viruses (blue) and extracellular  
419 released viruses (transparent grey), shown in side and top views. Scale bar is 300 nm in A  
420 and B, and 100 nm in C, D and E.

421

422 **Figure 6 | Proposed model of SARS-CoV-2 replication.** (1) Viral genome replication  
423 occurs inside the DMVs, generating the negative strand viral RNA (red), positive vRNA  
424 genomic copy and subgenomic mRNAs (blue). (2) Positive RNAs are exported to cytoplasm  
425 through the DMV pores. Subgenomic mRNAs are translated (2b). Structural proteins M, E  
426 and S associate with ER, Golgi and ERGIC membranes. Genomic vRNA becomes  
427 complexed with newly-synthesized N (2a). (3) S, E and M are transported in dense vesicles  
428 which are fuse with the ERGIC SMVs. (4) Productive viral assembly happens in the SMV  
429 clustering the viral spikes and encapsidating the genome in RNPs. Viruses bud to the internal  
430 space of the SMV. (5) Egress occurs through tunnels via exocytosis-like release (5a) or  
431 through membrane rupture (5b). The non-productive autophagolysosome-like compartment  
432 (ALC) is depicted in green. DMV, double membrane vesicle; SMV, single membrane  
433 vesicle; ALC, autophagolysosome-like compartment; LVCV, large virus-containing vesicle;  
434 SVCV, Single virus-containing vesicle.  
435

436 **Methods**

437 *Sample preparation*

438 Vero Ccl-81 cells (ATCC) were maintained Dulbecco Modified Eagle media supplemented  
439 with 5% Fetal Bovine Serum 10 units/mL penicillin (Gibco), 10 µg/mL streptomycin  
440 (Gibco), and 2mM l-glutamine. 16,000 cells were seeded on the carbon-side of fibronectin  
441 treated G300F1 R2/2 gold EM grids in a 6-well plate well. Infections were performed using  
442 passage 3 of SARS-CoV-2 England/02/2020 at MOI of 0.5, 0.1 or 0 (for negative controls).  
443 Media was removed from the Vero Ccl-81 cells (ATCC) and replaced with an appropriate  
444 amount of virus diluted in 0.5 mL of Dulbecco's modified Eagle medium (Merck) with 1%  
445 FCS, 10 units/mL penicillin (Gibco), 10 µg/mL streptomycin (Gibco), and 2mM l-glutamine.  
446 The cells were incubated at room temperature for 15 minutes after which a further 1.5 mL of  
447 media was added to each well. The plate was then incubated at 37 °C for 24 hours following  
448 which supernatants were discarded and cells washed with 2 mL of PBS. The cells were then  
449 fixed by addition of 3 mL of 4% paraformaldehyde in PBS for 1 hour at room temperature.  
450 After fixation, grids were plunge-frozen on a Leica Grid plunger 2. 1 ul of concentrated 10  
451 nm gold fiducials was applied to the gold-side of the EM grid and blotted from the gold-side.  
452 The grid was quickly immersed in liquid ethane after blotting. Frozen grids were stored in  
453 liquid nitrogen until data collection.

454

455 *CryoET data acquisition*

456 Tilt series acquisition was carried out at a FEI Titan Krios G2 (Thermo Fisher Scientific)  
457 electron microscope operated at 300 kV and equipped with a Gatan BioQuantum energy filter  
458 and post-GIF K3 detector (Gatan, Pleasanton, CA).

459

460 Tilt series were recorded using SerialEM tilt series controller with pixel sizes of 1.63 Å, 2.13  
461 Å and 4.58 Å for intact cells and 2.13 Å and 7.58 Å on lamella. Zero-loss imaging was used  
462 for all tilt series with a 20 eV slit width. Defocus values ranged from -2 µm to -7 µm, except  
463 for lamella at 7.58 Å pixel size where 50 µm defocus was used. A 100 µm objective aperture  
464 was inserted. A grouped dose-symmetric scheme was used for all tilt-series; intact cells were  
465 collected with a range of +/-60 degrees at 3 degree increments in groups of 3 and total dose  
466 of 120-135 e/Å<sup>2</sup>; lamella with +/-54 degrees at 3 degree increments and groups of 3 with total  
467 dose of 120-135 e/Å<sup>2</sup> at 4.58 Å and +/-54 degrees at 3 degree increments and groups of 10  
468 with total dose of 70-90 e/ Å<sup>2</sup> at 7.58 Å. Autofocus and tracking was performed at each tilt  
469 with drift measurement taken at tilt reversals with a 10 Å/s target rate. At each tilt, 5 movie  
470 frames were recorded using Correlated Double Sampling (CDS) in super-resolution mode  
471 and saved in lzw compressed tif format with no gain normalisation. Movies were  
472 subsequently gain normalised during motion correction and fourier cropped back to physical  
473 pixel size. After each tilt-series a script was run to take a fresh dark reference and reset the  
474 defocus offset.

475

#### 476 *CryoFIB lamella preparation*

477 Milling of SARS-Cov-2 infected cells was carried out using a Scios DualBeam cryoFIB  
478 (ThermoFisher Scientific) equipped with a PP3010T transfer system and stage (Quorum  
479 Technologies). Grids were sputter coated within the PP3010T transfer chamber maintained at  
480 -175 °C. After loading onto the Scios stage at -168 °C, the grids were inspected using the  
481 SEM (operated at 5 kV and 13 pA) and cells, identified as infected from TEM, were found.  
482 The grid surface was coated using the gas injection system  
483 (Trimethyl(methylcyclopentadienyl)platinum(IV), ThermoFisher Scientific) for 3 s, yielding  
484 a thickness of ~3 µm. Milling was performed using the ion beam operated at 30 kV and

485 currents decreasing from 300 pA to 30 pA. At 30 pA lamella thickness was less than 300 nm.  
486 During the final stage of milling, SEM inspection of the lamellae was conducted at 2 kV and  
487 13 pA.

488

#### 489 *Serial cryoFIB/SEM volume imaging*

490 Samples were imaged on a Zeis Crossbeam 550XL fitted with a Quorum transfer station and  
491 cryo-stage. They were mounted on a Quorum-compatible custom sample holder and coated  
492 with platinum for 60 sec at 10 mA on the Quorum transfer stage, prior to loading on the cryo-  
493 stage. Stage temperature was set at -165°C, while the anticontaminator was held at -185°C.  
494 Samples were imaged at 45° tilt after being coated again with Pt for 2x 30sec using the FIB-  
495 SEM's internal GIS system, with the Pt reservoir held at 25°C. Initial trapezoid trenches were  
496 milled at 30kV 7nA over 15 µm to reach a final depth of 10 µm, with a polish step over a  
497 rectangular box with a depth of 10 µm performed at 30kV 1.5 nA. Serial Sectioning and  
498 Imaging acquisition was performed as follows: FIB milling was set up using the 30kV 700  
499 pA probe, a z-slice step of 20 nm and a depth of 10 µm over the entire milling box; SEM  
500 imaging was performed at a pixel depth of 3024x2304 pixels, which resulted in a pixel size of  
501 6.5 nm, with the beam set at 2kV 35pA, dwell time 100 nsec and scan speed 1, averaging the  
502 signal over 100 line scans as a noise-reduction strategy.

503

#### 504 *CryoET image processing*

505 The frames in each tilt angle in a tilt series were processed to correct drift using MotionCor2  
506 (Zheng et al., 2017). For the intact cells dataset, all tilt series were aligned using the default  
507 parameters in IMOD version 4.10.22 with the eTomo interface, using gold-fiducial markers  
508 (Kremer et al., 1996). For lamella dataset, The tilt series were aligned in the framework of  
509 Appion-Protomo fiducial-less tilt-series alignment suite (Noble and Stagg, 2015). After tilt

510 series alignment, the tilt-series stacks together with the files describing the projection  
511 transformation and fitted tilt angles were transferred to emClarity for the subsequent sub-  
512 tomogram averaging analysis (Himes and Zhang, 2018).

513

#### 514 *Subtomogram averaging*

515 All sub-tomogram averaging analysis steps were performed using emClarity, mostly  
516 following previously published protocols described workflow (Himes and Zhang, 2018). The  
517 CTF estimation for each tilt was performed by using emClarity version 1.4.3 , and the  
518 subvolumes were selected by using automatic template matching function within emClarity  
519 using reference derived from EMDB-21452 (Walls et al., 2020) that was low-pass filtered to  
520 30-Å resolution in emClarity. The template matching results were cleaned manually by  
521 comparison of the binned tomograms overlaid with the emClarity-generated IMOD model  
522 showing the x,y,z coordinates of each cross-correlation peak detected. After manually  
523 template cleaning, A total of 450 subvolumes from the lamella dataset and a total of 7090  
524 subvolumes from the extracellular viruses dataset were retained, deriving from 3 tilt-series  
525 and 50 tilt-series respectively, for the following averaging and alignment steps in emClarity.  
526 For the extracellular viruses dataset, the 3D iterative averaging and alignment procedures  
527 were carried out gradually with binning of 4x, 3x, 2x , each with 2-3 iterations with  
528 increasingly restrictive search angles and translational shifts. 3-fold symmetry was applied  
529 during all the steps. Final converged average map was generated using bin2 tomograms with  
530 pixel size of 3.26 Å/pixel and a box size of 123×123×123 voxels. Resolution indicated by  
531 0.143 FSC cut-off was 8.7 Å. The same process was carried out for lamella dataset, except  
532 for the final average map was generated with pixel size of 4.26 Å/pixel  
533 and a box size of 90×90×90 voxels and a final resolution at 11 Å (Gold standard FSC at  
534 0.143 cut-off).

535

536 *Serial cryoFIB/SEM Segmentation*

537 Cell structures were manually segmented from stacks of images using ImageJ (Koppensteiner  
538 et al., 2012) and Microscopy Image Browser (MIB) software (Belevich et al., 2016) on a  
539 Windows computer with 32GB RAM and Wacom Cintiq Pro display tablet with pen.  
540 Datasets of below 2GB in .mrc format were analysed one at a time, where one dataset  
541 comprised of 200 subsequent images on average.

542

543 *CryoET segmentation and 3D visualization*

544 Transport vesicles, Viral membrane, Nuclear membrane, Double membrane vesicles (DMV),  
545 and single membrane vesicles (SMV) were segmented using Convolutional Neural Networks  
546 based tomogram annotation in the EMAN2.2 software package (Chen et al., 2017). Viral  
547 spikes were mapped back to their original particles position using emClarity tomoCPR  
548 function. UCSF Chimera (Pettersen et al., 2004) was used to visualize the segmentations and  
549 subtomogram average structures in 3D.

550

551 *Soft X-ray Cryo-tomography*

552 Data were collected in areas of interest on vitrified samples on 3mm TEM grids according to  
553 established protocols (Kounatidis et al., 2020). Grids were loaded on the X-ray microscope at  
554 B24 and were first mapped using visible light with a 20X objective. The resulting coordinate-  
555 map was used to locate areas of interest where 2D X-ray mosaics were collected (X-ray light  
556 used was at 500eV) and used to identify areas of interest within. Tilt series of 100-120 ° were  
557 collected for each field of view area of interest at 0.2 or 0.5° steps with constant exposure of  
558 0.5 sec keeping average pixel intensity to between 5-30k counts. All tilt series were

559 background subtracted, saved as raw Tiff stacks and reconstructed using either IMOD

560 (Kremer et al., 1996) or Batchruntomo (Mastronarde, 2005).

561

562 *Quantification and statistical analyses*

563 Number of pores in DMV and plasma membrane discontinuities were determined after visual

564 inspection and visual counting by two independent investigators. The investigators were not

565 blinded to allocation during experiments and outcome assessment.

566

567



## 568 **References**

- 569 Andrejeva, J., Childs, K.S., Young, D.F., Carlos, T.S., Stock, N.,  
570 Goodbourn, S., and Randall, R.E. (2004). The V proteins of paramyxoviruses  
571 bind the IFN-inducible RNA helicase, mda-5, and inhibit its activation of  
572 the IFN-beta promoter. *Proc Natl Acad Sci U S A* *101*, 17264-17269.
- 573 Belevich, I., Joensuu, M., Kumar, D., Vihinen, H., and Jokitalo, E. (2016).  
574 Microscopy Image Browser: A Platform for Segmentation and Analysis of  
575 Multidimensional Datasets. *PLoS Biol* *14*, e1002340.
- 576 Belouzard, S., Chu, V.C., and Whittaker, G.R. (2009). Activation of the  
577 SARS coronavirus spike protein via sequential proteolytic cleavage at two  
578 distinct sites. *Proceedings of the National Academy of Sciences of the*  
579 *United States of America* *106*, 5871-5876.
- 580 Berger, W., Steiner, E., Grusch, M., Elbling, L., and Micksche, M. (2009).  
581 Vaults and the major vault protein: Novel roles in signal pathway  
582 regulation and immunity. *Cellular and Molecular Life Sciences* *66*, 43-61.
- 583 Cai, Y., Zhang, J., Xiao, T., Peng, H., Sterling, S.M., Walsh, R.M.,  
584 Rawson, S., Rits-Volloch, S., and Chen, B. (2020). Distinct conformational  
585 states of SARS-CoV-2 spike protein. *Science* *1592*, eabd4251-eabd4251.
- 586 Chen, M., Dai, W., Sun, S.Y., Jonasch, D., He, C.Y., Schmid, M.F., Chiu,  
587 W., and Ludtke, S.J. (2017). Convolutional neural networks for automated  
588 annotation of cellular cryo-electron tomograms. *Nat Methods* *14*, 983-985.
- 589 de Wilde, A.H., Raj, V.S., Oudshoorn, D., Bestebroer, T.M., van Nieuwkoop,  
590 S., Limpens, R.W.A.L., Posthuma, C.C., van der Meer, Y., Bárcena, M.,  
591 Haagmans, B.L., *et al.* (2013). MERS-coronavirus replication induces severe  
592 in vitro cytopathology and is strongly inhibited by cyclosporin A or  
593 interferon- $\alpha$  treatment. *Journal of General Virology* *94*, 1749-1760.
- 594 Doyle, N., Neuman, B.W., Simpson, J., Hawes, P.C., Mantell, J., Verkade,  
595 P., Alrashedi, H., and Maier, H.J. (2018). Infectious bronchitis virus  
596 nonstructural protein 4 alone induces membrane pairing. *Viruses* *10*, 1-17.
- 597 Ertel, K.J., Benefield, D., Castaño-Diez, D., Pennington, J.G., Horswill,  
598 M., Den Boon, J.A., Otegui, M.S., and Ahlquist, P. (2017). Cryo-electron  
599 tomography reveals novel features of a viral rna replication compartment.  
600 *eLife* *6*, 1-24.
- 601 Fan, X., Cao, D., Kong, L., and Zhang, X. (2020). Cryo-EM analysis of the  
602 post-fusion structure of the SARS-CoV spike glycoprotein. *Nature*  
603 *Communications* *11*, 1-10.
- 604 Fried, J.A., Ramasubbu, K., Bhatt, R., Topkara, V.K., Clerkin, K.J., Horn,  
605 E., Rabbani, L.R., Brodie, D., Jain, S.S., Kirtane, A.J., *et al.* (2020).  
606 The variety of cardiovascular presentations of COVID-19. *Circulation*, 1930-  
607 1936.
- 608 Goldsmith, C.S., Tatti, K.M., Ksiazek, T.G., Rollin, P.E., Comer, J.A.,  
609 Lee, W.W., Rota, P.A., Bankamp, B., Bellini, W.J., and Zaki, S.R. (2004).  
610 Ultrastructural Characterization of SARS Coronavirus. *Emerging Infectious*  
611 *Diseases* *10*, 320-326.

612 Hagemeyer, M.C., Monastyrska, I., Griffith, J., van der Sluijs, P.,  
613 Voortman, J., van Bergen en Henegouwen, P.M., Vonk, A.M., Rottier, P.J.M.,  
614 Reggiori, F., and De Haan, C.A.M. (2014). Membrane rearrangements mediated  
615 by coronavirus nonstructural proteins 3 and 4. *Virology* *458-459*, 125-135.  
616 Harkiolaki, M., Darrow, M.C., Spink, M.C., Kosior, E., Dent, K., and Duke,  
617 E. (2018). Cryo-soft X-ray tomography: using soft X-rays to explore the  
618 ultrastructure of whole cells. *Emerging Topics in Life Sciences* *2*, 81-92.  
619 Himes, B.A., and Zhang, P. (2018). emClarity: software for high-resolution  
620 cryo-electron tomography and subtomogram averaging. *Nat Methods* *15*, 955-  
621 961.  
622 Hoffmann, M., Kleine-Weber, H., Schroeder, S., Krüger, N., Herrler, T.,  
623 Erichsen, S., Schiergens, T.S., Herrler, G., Wu, N.H., Nitsche, A., *et al.*  
624 (2020). SARS-CoV-2 Cell Entry Depends on ACE2 and TMPRSS2 and Is Blocked by  
625 a Clinically Proven Protease Inhibitor. *Cell* *181*, 271-280. e278.  
626 Hornung, V., Ellegast, J., Kim, S., Brzozka, K., Jung, A., Kato, H., Poeck,  
627 H., Akira, S., Conzelmann, K.K., Schlee, M., *et al.* (2006). 5'-Triphosphate  
628 RNA is the ligand for RIG-I. *Science* *314*, 994-997.  
629 Ke, Z., Oton, J., Qu, K., Cortese, M., Zila, V., McKeane, L., Nakane, T.,  
630 Zivanov, J., Neufeldt, C.J., Cerikan, B., *et al.* (2020). Structures and  
631 distributions of SARS-CoV-2 spike proteins on intact virions. *Nature*.  
632 Knoops, K., Kikkert, M., Van Den Worm, S.H.E., Zevenhoven-Dobbe, J.C., Van  
633 Der Meer, Y., Koster, A.J., Mommaas, A.M., and Snijder, E.J. (2008). SARS-  
634 coronavirus replication is supported by a reticulovesicular network of  
635 modified endoplasmic reticulum. *PLoS Biology* *6*, 1957-1974.  
636 Koppensteiner, H., Banning, C., Schneider, C., Hohenberg, H., and  
637 Schindler, M. (2012). Macrophage internal HIV-1 is protected from  
638 neutralizing antibodies. *J Virol* *86*, 2826-2836.  
639 Kounatidis, I., Stanifer, M.L., Phillips, M.A., Paul-Gilloteaux, P.,  
640 Heiligenstein, X., Wang, H., Okolo, C.A., Fish, T.M., Spink, M.C., Stuart,  
641 D.I., *et al.* (2020). 3D Correlative Cryo-Structured Illumination  
642 Fluorescence and Soft X-ray Microscopy Elucidates Reovirus Intracellular  
643 Release Pathway. *Cell* *182*, 515-530. e517.  
644 Kremer, J.R., Mastronarde, D.N., and McIntosh, J.R. (1996). Computer  
645 visualization of three-dimensional image data using IMOD. *J Struct Biol*  
646 *116*, 71-76.  
647 Lamers, M.M., Beumer, J., Vaart, J.V.D., Knoops, K., Puschhof, J., Breugem,  
648 T.I., Ravelli, R.B.G., Schayck, J.P.V., Mykytyn, A.Z., Duimel, H.Q., *et al.*  
649 (2020). SARS-CoV-2 productively infects human gut enterocytes. *Science* *369*,  
650 50-54.  
651 Lan, J., Ge, J., Yu, J., Shan, S., Zhou, H., Fan, S., Zhang, Q., Shi, X.,  
652 Wang, Q., Zhang, L., *et al.* (2020). Structure of the SARS-CoV-2 spike  
653 receptor-binding domain bound to the ACE2 receptor. *Nature* *581*, 215-220.  
654 Lu, S., Ye, Q., Singh, D., Villa, E., Cleveland, D.W., and Corbett, K.D.  
655 (2020). The SARS-CoV-2 Nucleocapsid phosphoprotein forms mutually exclusive

656 condensates with RNA and the membrane-associated M protein. bioRxiv : the  
657 preprint server for biology.

658 Lucas, C., Wong, P., Klein, J., Castro, T.B.R., Silva, J., Sundaram, M.,  
659 Ellingson, M.K., Mao, T., Oh, J.E., Israelow, B., *et al.* (2020).  
660 Longitudinal analyses reveal immunological misfiring in severe COVID-19.  
661 *Nature* 584.

662 Mastronarde, D.N. (2005). Automated electron microscope tomography using  
663 robust prediction of specimen movements. *J Struct Biol* 152, 36-51.

664 Neufeldt, C.J., Joyce, M.A., Van Buuren, N., Levin, A., Kirkegaard, K.,  
665 Gale, M., Tyrrell, D.L.J., and Wozniak, R.W. (2016). The Hepatitis C Virus-  
666 Induced Membranous Web and Associated Nuclear Transport Machinery Limit  
667 Access of Pattern Recognition Receptors to Viral Replication Sites. *PLoS*  
668 *Pathogens* 12, 1-28.

669 Neuman, B.W., Kiss, G., Kunding, A.H., Bhella, D., Baksh, M.F., Connelly,  
670 S., Droese, B., Klaus, J.P., Makino, S., Sawicki, S.G., *et al.* (2011). A  
671 structural analysis of M protein in coronavirus assembly and morphology.  
672 *Journal of Structural Biology* 174, 11-22.

673 Noble, A.J., and Stagg, S.M. (2015). Automated batch fiducial-less tilt-  
674 series alignment in Appion using Protomo. *Journal of Structural Biology*  
675 192, 270-278.

676 Ogando, N.S., Dalebout, T.J., Zevenhoven-Dobbe, J.C., Limpens, R.W.A.L.,  
677 van der Meer, Y., Caly, L., Druce, J., de Vries, J.J.C., Kikkert, M.,  
678 Bárcena, M., *et al.* (2020). SARS-coronavirus-2 replication in Vero E6  
679 cells: replication kinetics, rapid adaptation and cytopathology. *Journal of*  
680 *General Virology*.

681 Oudshoorn, D., Rijs, K., Limpens, R.W.A.L., Groen, K., Koster, A.J.,  
682 Snijder, E.J., Kikkert, M., and Bárcena, M. (2017). Expression and cleavage  
683 of middle east respiratory syndrome coronavirus nsp3-4 polyprotein induce  
684 the formation of double-membrane vesicles that mimic those associated with  
685 coronaviral RNA replication. *mBio* 8, 1-17.

686 Paul, D., Hoppe, S., Saher, G., Krijnse-Locker, J., and Bartenschlager, R.  
687 (2013). Morphological and Biochemical Characterization of the Membranous  
688 Hepatitis C Virus Replication Compartment. *Journal of Virology* 87, 10612-  
689 10627.

690 Pettersen, E.F., Goddard, T.D., Huang, C.C., Couch, G.S., Greenblatt, D.M.,  
691 Meng, E.C., and Ferrin, T.E. (2004). UCSF Chimera--a visualization system  
692 for exploratory research and analysis. *J Comput Chem* 25, 1605-1612.

693 Reggiori, F., Monastyrska, I., Verheije, M.H., Cali, T., Ulasli, M.,  
694 Bianchi, S., Bernasconi, R., De Haan, C.A.M., and Molinari, M. (2010).  
695 Coronaviruses hijack the LC3-I-positive EDEMosomes, ER-derived vesicles  
696 exporting short-lived ERAD regulators, for replication. *Cell Host and*  
697 *Microbe* 7, 500-508.

698 Shang, J., Ye, G., Shi, K., Wan, Y., Luo, C., Aihara, H., Geng, Q.,  
699 Auerbach, A., and Li, F. (2020). Structural basis of receptor recognition  
700 by SARS-CoV-2. *Nature* *581*, 221–224.

701 Sharma, A., Garcia, G., Wang, Y., Plummer, J.T., Morizono, K.,  
702 Arumugaswami, V., and Svendsen, C.N. (2020). Human iPSC-Derived  
703 Cardiomyocytes Are Susceptible to SARS-CoV-2 Infection. *Cell Reports*  
704 *Medicine* *1*, 100052–100052.

705 Simmons, G., Reeves, J.D., Rennekamp, A.J., Amberg, S.M., Piefer, A.J., and  
706 Bates, P. (2004). Characterization of severe acute respiratory syndrome-  
707 associated coronavirus (SARS-CoV) spike glycoprotein-mediated viral entry.  
708 *Proceedings of the National Academy of Sciences of the United States of*  
709 *America* *101*, 4240–4245.

710 Snijder, E.J., Limpens, R.W.A.L., de Wilde, A.H., de Jong, A.W.M.,  
711 Zevenhoven-Dobbe, J.C., Maier, H.J., Faas, F.F.G.A., Koster, A.J., and  
712 Bárcena, M. (2020). A unifying structural and functional model of the  
713 coronavirus replication organelle: Tracking down RNA synthesis. *PLoS*  
714 *Biology* *18*, 1–25.

715 Song, W., Gui, M., Wang, X., and Xiang, Y. (2018). Cryo-EM structure of the  
716 SARS coronavirus spike glycoprotein in complex with its host cell receptor  
717 ACE2. *14*, e1007236.

718 Stertz, S., Reichelt, M., Spiegel, M., Kuri, T., Martínez-Sobrido, L.,  
719 García-Sastre, A., Weber, F., and Kochs, G. (2007). The intracellular sites  
720 of early replication and budding of SARS-coronavirus. *Virology* *361*, 304–  
721 315.

722 Surya, W., Li, Y., and Torres, J. (2018). Structural model of the SARS  
723 coronavirus E channel in LMPG micelles. *Biochimica et Biophysica Acta -*  
724 *Biomembranes* *1860*, 1309–1317.

725 Sutton, G., Sun, D., Fu, X., Kotecha, A., Hecksel, C.W., Clare, D.K.,  
726 Zhang, P., Stuart, D.I., and Boyce, M. (2020). Assembly intermediates of  
727 orthoreovirus captured in the cell. *Nature Communications* *11*, 1–7.

728 Toelzer, C., Gupta, K., Yadav, S.K.N., Borucu, U., Davidson, A.D., Kavanagh  
729 Williamson, M., Shoemark, D.K., Garzoni, F., Staufer, O., Milligan, R., *et*  
730 *al.* (2020). Free fatty acid binding pocket in the locked structure of SARS-  
731 CoV-2 spike protein. *Science*.

732 Turoňová, B., Sikora, M., Schürmann, C., Hagen, W., Welsch, S., Blanc, F.,  
733 von Bülow, S., Gecht, M., Bagola, K., Hörner, C., *et al.* (2020). In situ  
734 structural analysis of SARS-CoV-2 spike reveals flexibility mediated by  
735 three hinges. *5223*, 1–12.

736 Vennema, H., Godeke, G.J., Rossen, J.W.A., Voorhout, W.F., Horzinek, M.C.,  
737 Opstelten, D.J.E., and Rottier, P.J.M. (1996). Nucleocapsid-independent  
738 assembly of coronavirus-like particles by co-expression of viral envelope  
739 protein genes. *EMBO Journal* *15*, 2020–2028.

740 Walls, A.C., Park, Y.J., Tortorici, M.A., Wall, A., McGuire, A.T., and  
741 Veessler, D. (2020). Structure, Function, and Antigenicity of the SARS-CoV-2  
742 Spike Glycoprotein. *Cell* *181*, 281–292. e286.

743 Wang, Q., Zhang, Y., Wu, L., Niu, S., Song, C., Zhang, Z., Lu, G., Qiao,  
744 C., Hu, Y., Yuen, K.Y., *et al.* (2020). Structural and Functional Basis of  
745 SARS-CoV-2 Entry by Using Human ACE2. *Cell* *181*, 894–904. e899.

746 Wolff, G., Limpens, R.W.A.L., Zevenhoven-Dobbe, J.C., Laugks, U., Zheng,  
747 S., de Jong, A.W.M., Koning, R.I., Agard, D.A., Grünewald, K., Koster,  
748 A.J., *et al.* (2020a). A molecular pore spans the double membrane of the  
749 coronavirus replication organelle. *Science* *3629*, eabd3629–eabd3629.

750 Wolff, G., Melia, C.E., Snijder, E.J., and Bárcena, M. (2020b). Double-  
751 Membrane Vesicles as Platforms for Viral Replication. *Trends in*  
752 *Microbiology*.

753 Woodward, C.L., Mendonca, L.M., and Jensen, G.J. (2015). Direct  
754 visualization of vaults within intact cells by electron cryo-tomography.  
755 *Cell Mol Life Sci* *72*, 3401–3409.

756 Yan, R., Zhang, Y., Li, Y., Xia, L., Guo, Y., and Zhou, Q. (2020).  
757 Structural basis for the recognition of the SARS-CoV-2 by full-length human  
758 ACE2. *Science*.

759 Yao, H., Song, Y., Chen, Y., Wu, N., Xu, J., Sun, C., Zhang, J., Weng, T.,  
760 Zhang, Z., Wu, Z., *et al.* (2020). Molecular architecture of the SARS-CoV-2  
761 virus.

762 Zheng, S.Q., Palovcak, E., Armache, J.P., Verba, K.A., Cheng, Y., and  
763 Agard, D.A. (2017). MotionCor2: anisotropic correction of beam-induced  
764 motion for improved cryo-electron microscopy. *Nat Methods* *14*, 331–332.

765 Zhou, X., Cong, Y., Veenendaal, T., Klumperman, J., Shi, D., Mari, M., and  
766 Reggiori, F. (2017). Ultrastructural characterization of membrane  
767 rearrangements induced by porcine epidemic diarrhea virus infection.  
768 *Viruses* *9*.

769 Zhu, Y., Sun, D., Schertel, A., Martin-fernandez, M.L., Freyberg, Z.,  
770 Zhang, P., Ning, J., Fu, X., Gwo, P.P., and Watson, A.M. (2021). Short  
771 Article Serial cryoFIB / SEM Reveals Cytoarchitectural Disruptions in Leigh  
772 Syndrome Patient Cells Serial cryoFIB / SEM Reveals Cytoarchitectural  
773 Disruptions in Leigh Syndrome Patient Cells. *Structure/Folding and Design*,  
774 1–6.

775

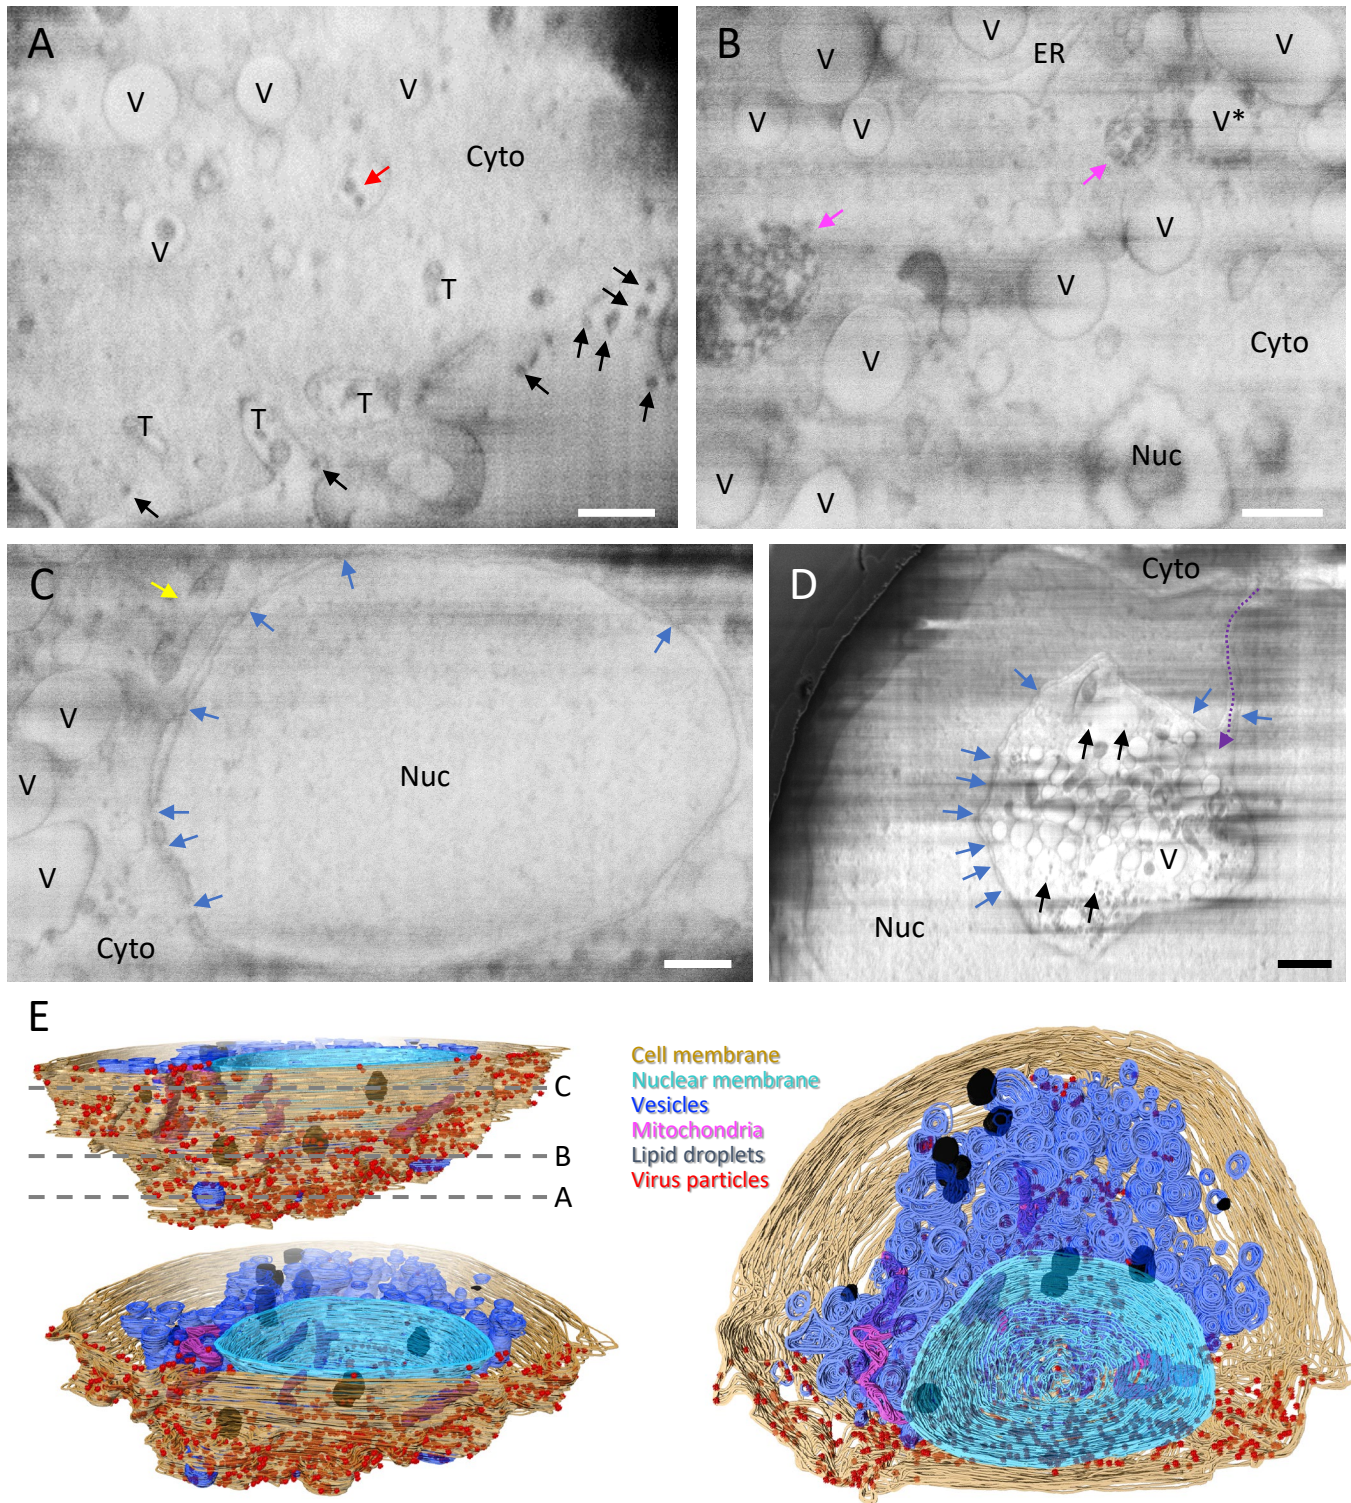

**Figure 1 | Serial cryoFIB/SEM volume imaging of entire SARS-CoV-2 infected cell.** (A-D) Representative cryoFIB/SEM slices of a SARS-CoV-2 infected cell at the cell periphery (A), cytoplasm (B), cell nucleus (C), and invagination of cytoplasm into the nuclear space (note, from a different cell) (D). Scale bars, 500 nm in A-C, 1  $\mu$ m in D. Black and red arrows, extracellular and intracellular virus particles; blue arrows, nuclear pores; yellow arrow, a damaged mitochondria; pink arrows, complex membrane compartment; dashed purple arrow, invagination path; V and V\*, vesicles; T, tunnels; Nuc, nucleus; Cyto, cytoplasm; ER, Endoplasmic reticulum. (E) Surface rendering of the segmented volume of SARS-CoV-2 infected cell shown in A-C. Segmented organelles and virus particles are labeled with colors indicated. The dashed lines (E, top left panel) indicate the positions of slices shown in A-C, respectively.

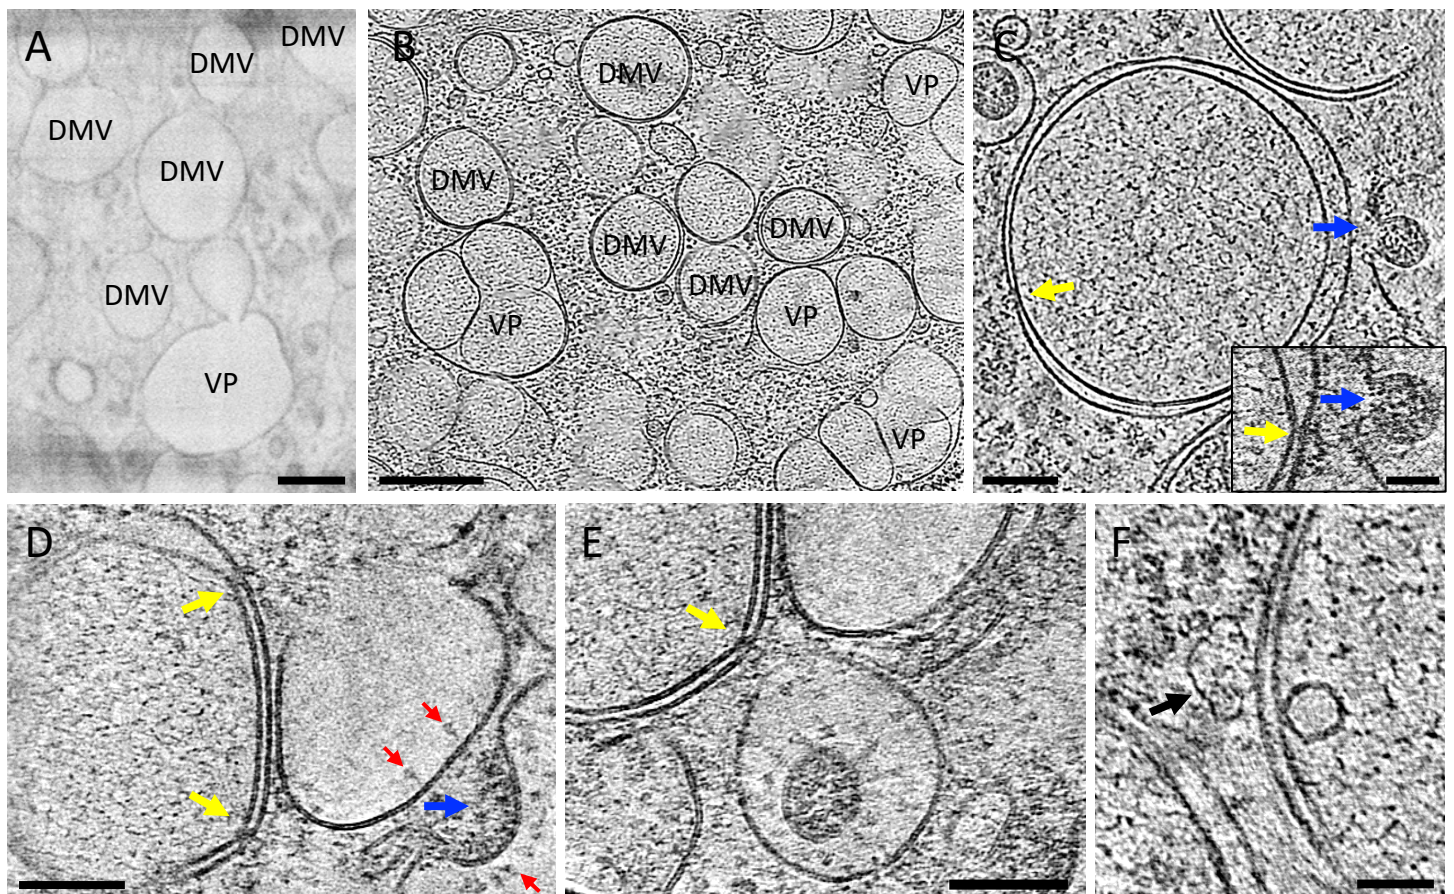

**Figure 2 | SARS-CoV-2 genome replication and RNA synthesis.** (A-B) Overview of a SARS-CoV-2 infected cell in cryoFIB/SEM slice (A) and cryo-lamella tomogram slice (B) depicting double membrane vesicles (DMV) and vesicle packets (VP). (C) Cryo-tomogram slice of DMV at high magnification. Inset depicts detail of a DMV pore next to a viral assembly site. (D-E) Pores on DMVs next to assembly sites. (F) Vaultosome in close proximity to a DMV outer membrane. DMV – Double membrane vesicle. VP – Vesicle packet. Yellow arrows – DMV portals. Blue arrows – Viral assembly sites. Red arrows – Viral spikes. Black arrow – Vaultosome. Scale bars are 300 nm in A, 500 nm in B, 100 nm in C, 50 nm in C inset, 100 nm in D and E, 50 nm in F.

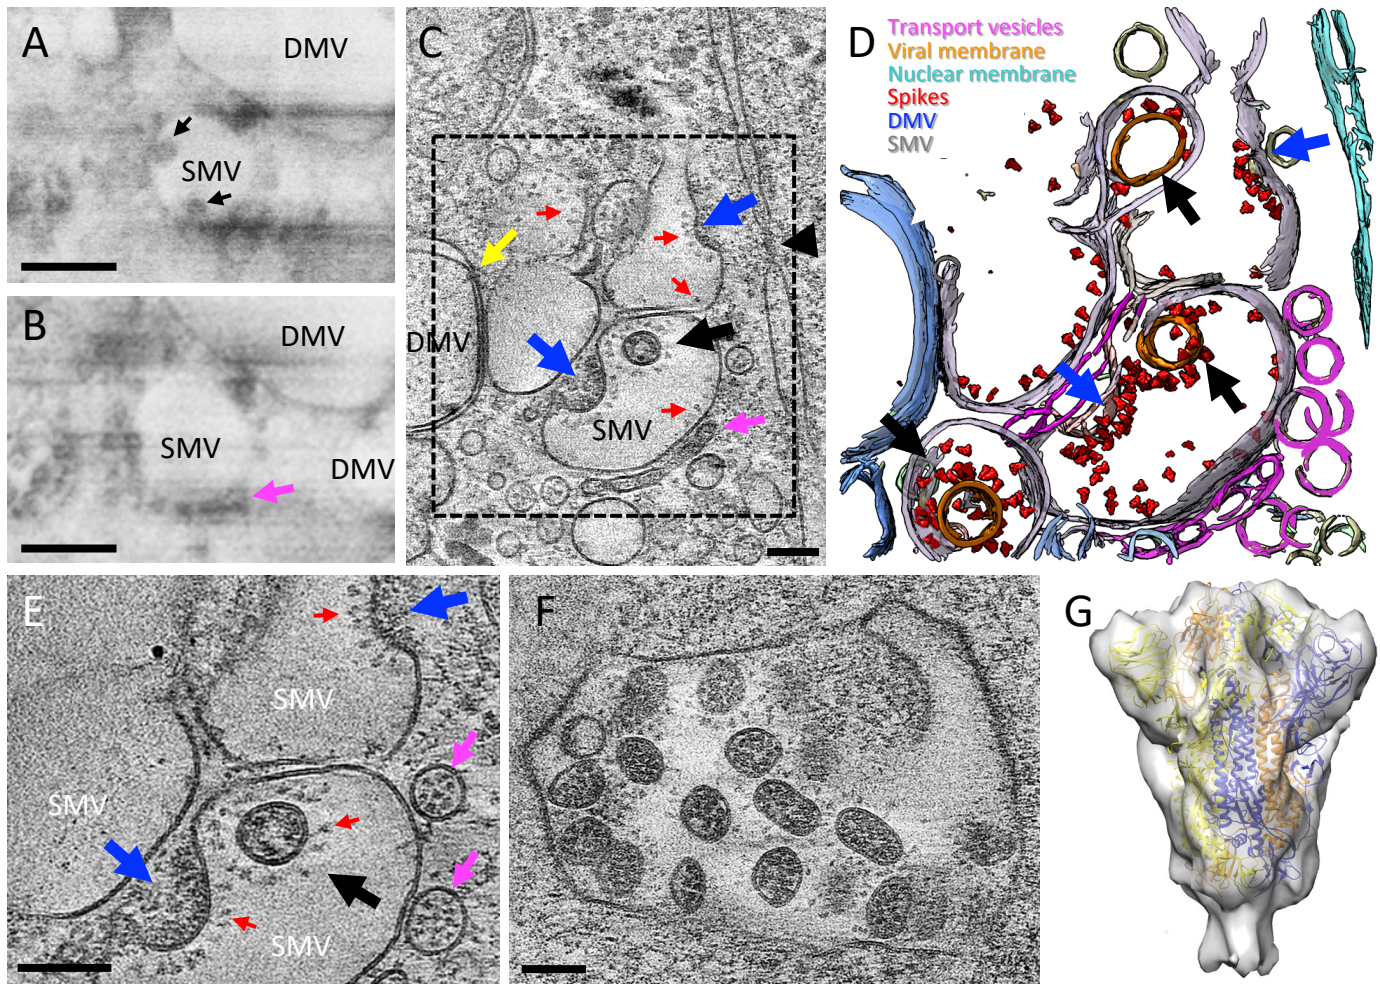

**Figure 3 | SARS-CoV-2 cytoplasmic viral assembly.** (A-B) CryoFIB/SEM images of two sequential slices separated by 80 nm. Black arrows point to virus particles in single membrane vesicle (SMV). Pink arrow points to small dense vesicles lining the outside of virus-containing SMV. (C) Tomographic slice of cryoFIB lamella depicting SARS-CoV-2 assembly, with DMV portals (yellow arrow), assembling viruses (blue arrow), assembled virus (black arrow), viral spikes on SMV membranes (red arrows), dense vesicles around the assembly site (pink arrow, as in B) and a nucleopore (black arrowhead). (D) Density segmentation of C, displaying three virus particles (black arrows) and two assembly sites (blue arrows). (E) An enlarged view (at a different angle) of boxed area in C, showing assembled virus (black arrow), assembling viruses (blue arrows), spikes (red arrows) and spike-containing vesicles (pink arrows). (F) Large intracellular virus-containing vesicle (LVCV) full of readily assembled viruses. (G) Subtomogram average of viral spikes of intracellular viruses from cell lamellae at 11 Å resolution, fitted with an atomic model of spike trimer (PDB 6ZB5) (Toelzer et al., 2020). Scale bar is 300 nm in A and B; and 100 nm in C, E and F.



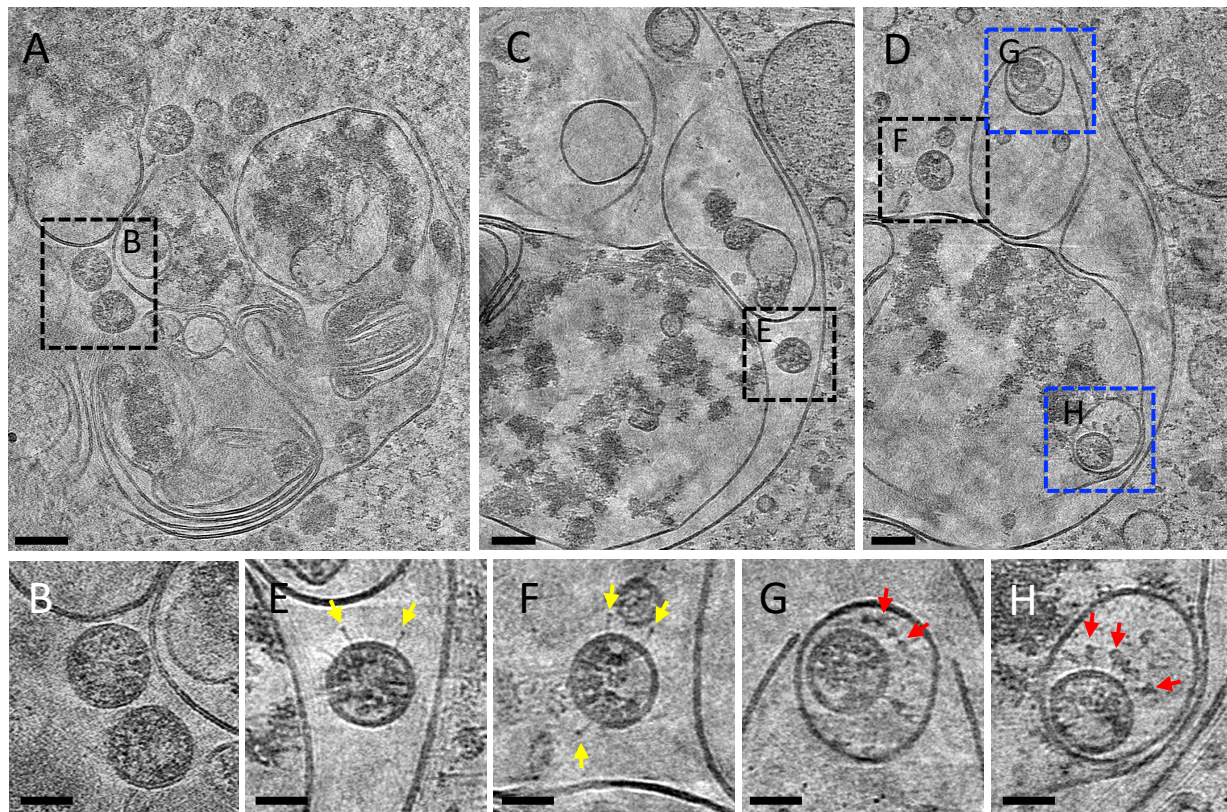

**Figure 4 | Non-productive autophagolysosome-like compartments (ALC).** (A) Tomographic slice of an ALC in cell lamella depicting convoluted membranes containing virus particles (boxed area). (B) Detailed view of spikeless viruses from the boxed area in A. (C-D) Consecutive tomographic slices of the same ALC separated by 140 nm, containing viruses (black and blue boxed areas). (E-F) Detailed view of viruses with a few postfusion spikes (yellow arrows) from boxed areas in C and D. (G-H) Detailed view of viruses protected by single membrane vesicles (SMV) harboring prefusion spikes (red arrows) from blue boxed areas in D. Scale bars are 500 nm in A; 100 nm in B, C; 50 nm in C, D, E, F, G, H.

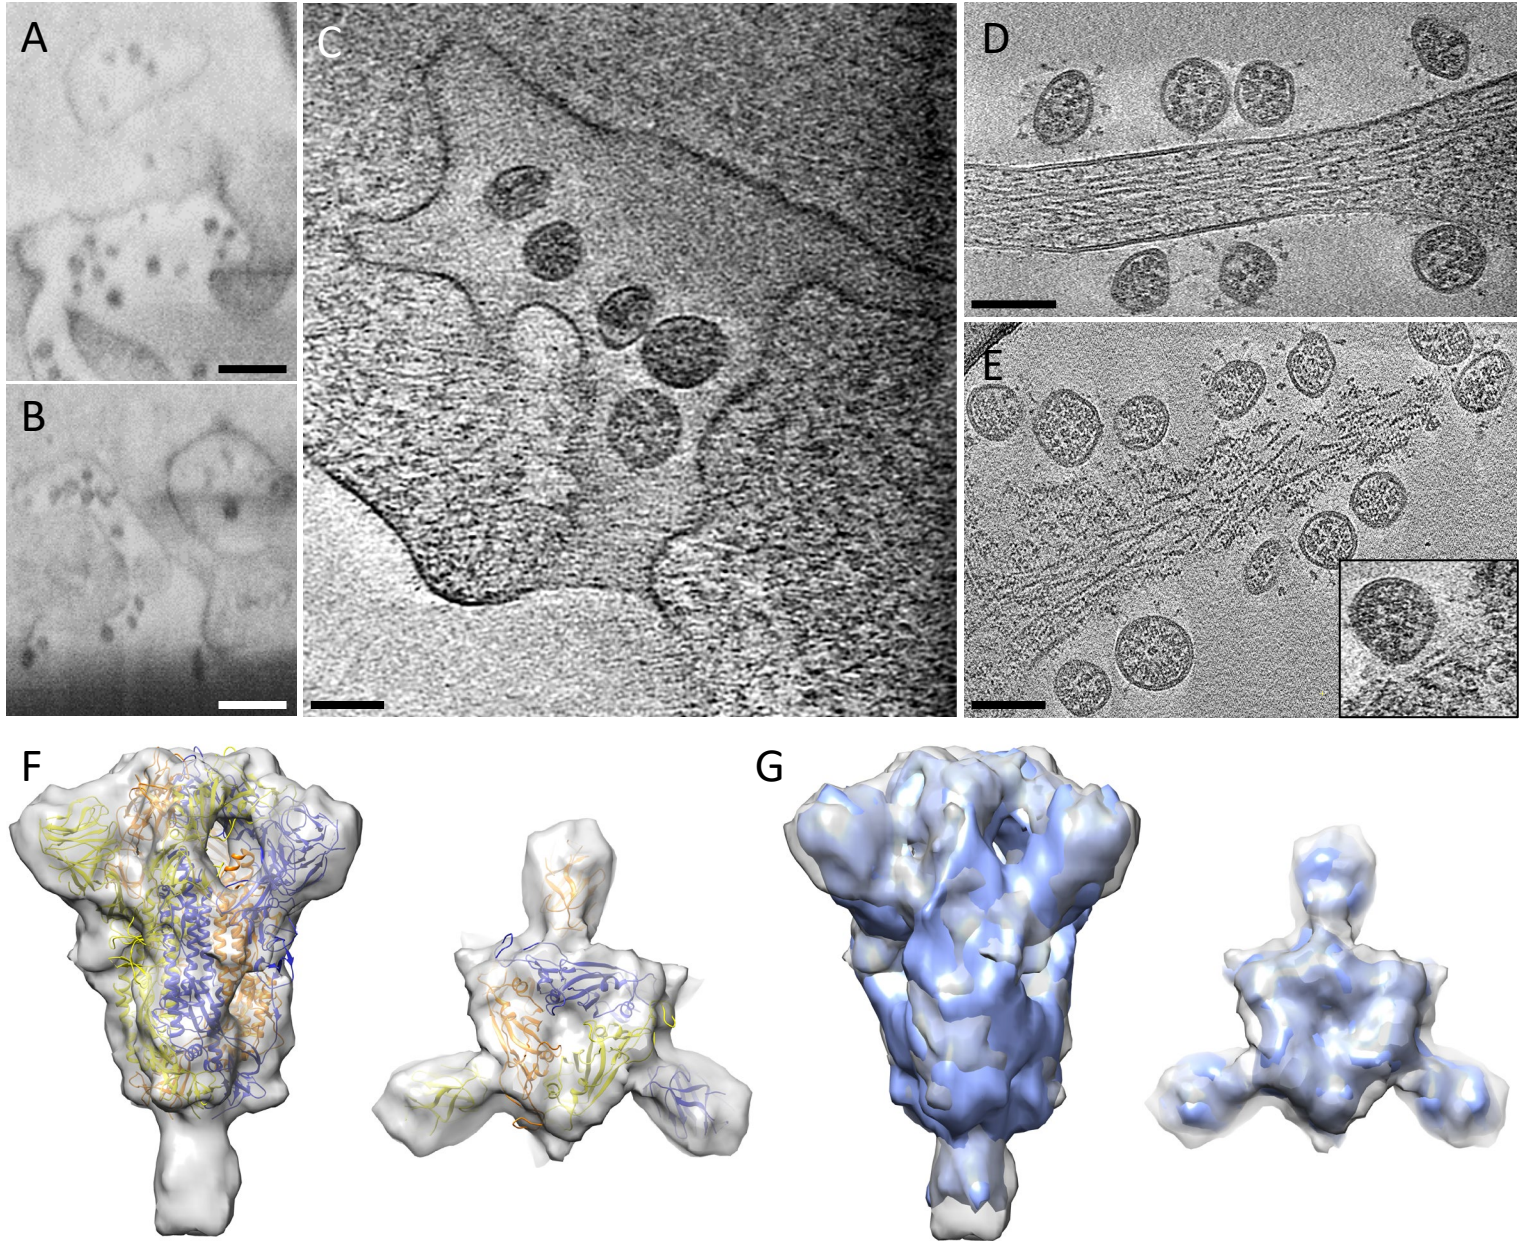

**Figure 5 | SARS-CoV-2 viral egress pathways.** (A-B) CryoFIB/SEM images of cell periphery, depicting virus particles exiting through extended tunnels connected to external of the cell. (C) CryoET of the SARS-CoV-2 exiting tunnel. (D) Viruses outside of the cell. (E) Membrane-rupture viral egress. Inset, close-up views of membrane rupture sites. (F) Subtomogram average of spikes on released viruses at 9 Å resolution fitted with an atomic model of spike trimer (PDB 6ZB5) (Toelzer et al., 2020), viewed from side and top. (G) Comparison of spike structures from intracellular assembled viruses (blue) and extracellular released viruses (transparent grey), shown in side and top views. Scale bar is 300 nm in A and B, and 100 nm in C, D and E.

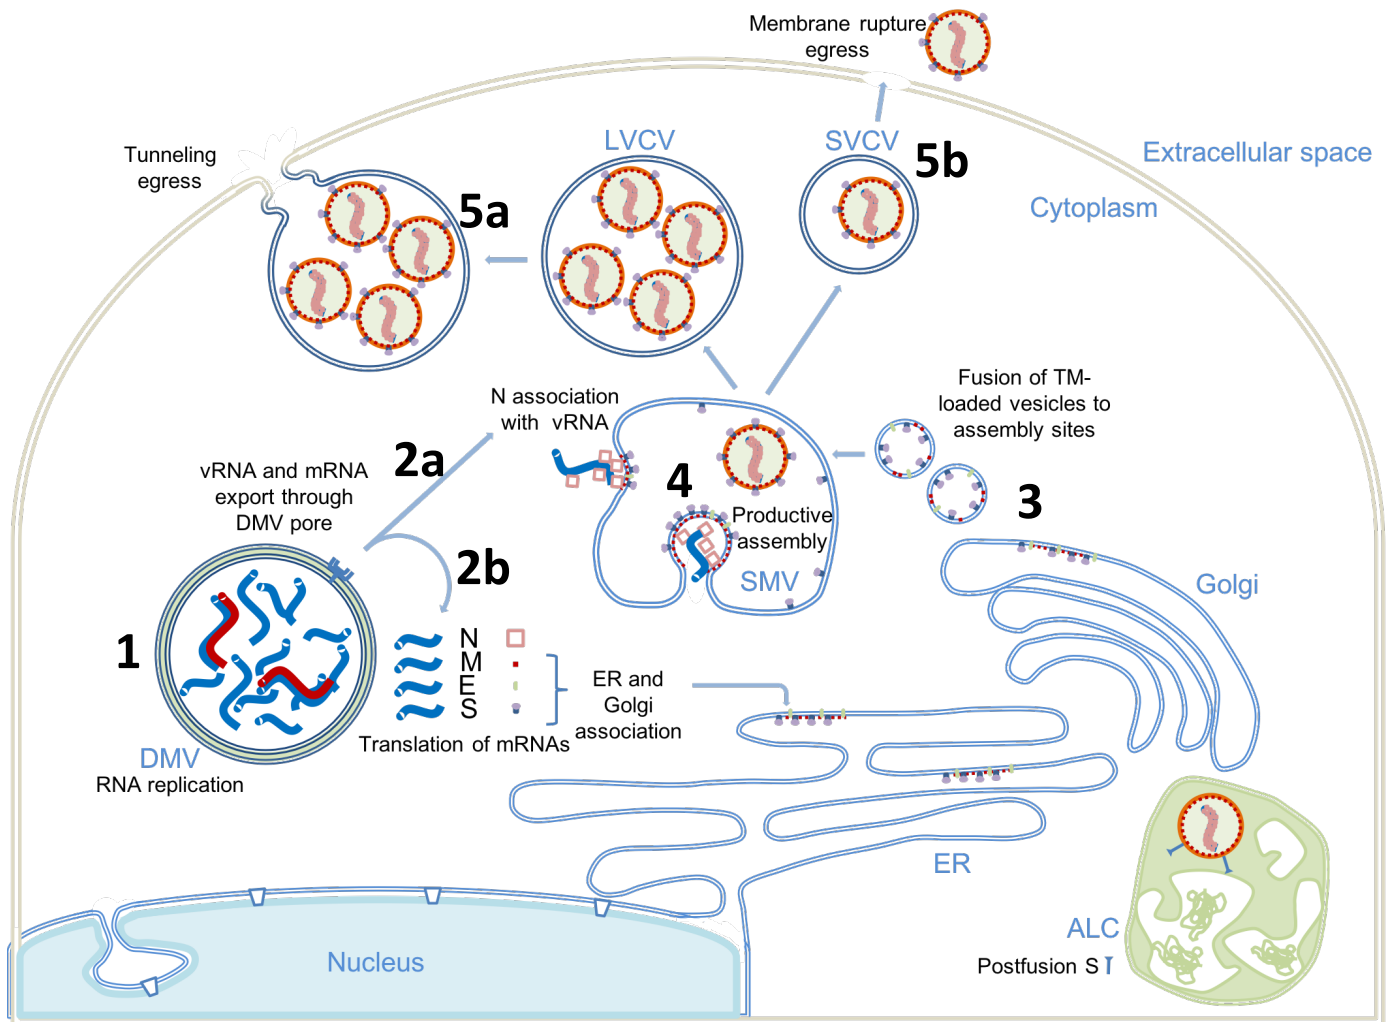

**Figure 6 | Proposed model of SARS-CoV-2 replication.** (1) Viral genome replication occurs inside the DMVs, generating the negative strand viral RNA (red), positive vRNA genomic copy and subgenomic mRNAs (blue). (2) Positive RNAs are exported to cytoplasm through the DMV pores. Subgenomic mRNAs are translated (2b). Structural proteins M, E and S associate with ER, Golgi and ERGIC membranes. Genomic vRNA becomes complexed with newly-synthesized N (2a). (3) S, E and M are transported in dense vesicles which are fuse with the ERGIC SMVs. (4) Productive viral assembly happens in the SMV clustering the viral spikes and encapsidating the genome in RNPs. Viruses bud to the internal space of the SMV. (5) Egress occurs through tunnels via exocytosis-like release (5a) or through membrane rupture (5b). The non-productive autophagolysosome-like compartment (ALC) is depicted in green. DMV, double membraned vesicle; SMV, single membrane vesicle; ALC, autophagolysosome-like compartment; LVCV, large virus-containing vesicle; SVCV, Single virus-containing vesicle.
